# Supplementary material for: The tuberculocidal activity of polyaniline and functionalised polyanilines
Source: PeerJ. 2016 Dec 20;4:e2795. doi: 10.7717/peerj.2795 (PMC5178338; doi:10.7717/peerj.2795)
Supplement: Data S1 [file peerj-04-2795-s001.xlsx]

## Sheet: Sheet1
The tuberculocidal activity of conducting polymers: support for their incorporation into facemasks to improve infection control
Raw data
FIG 1. Antimicrobial action of surface incorporated PANI and P3ABA against M. smegmatis BSG200
A	Bioluminescence (RLU s-1) 24 h post-rescue
	10% PANI treatment			8% PANI treatment			Untreated			Background
15min	518	442	634	730	1580	3270	4500	8410	8500	30	30	30
30min	6	136	14	32	1320	896	5360	7820	8370	30	30	30
120min	2	2	2	2	2	1	4900	8000	10000	30	30	30
B	Bioluminescence (RLU s-1) 24 h post-rescue
	3.5% P3ABA treatment			2% P3ABA treatment			1% P3ABA treatment			Untreated			Background
15min	1	2	1	4	4	2	734	84	4	4500	8410	8500	30	30	30
30min	1	4	1	2	4	1	2	2	2	5360	7820	8370	30	30	30
120min	2	2	4	2	4	1	1	2	2	4900	8000	10000	30	30	30
FIG 2. Antimicrobial action of surface incorporated PANI and P3ABA against M. tuberculosis BSG001
A	Bioluminescence (RLU s-1) 21 days post-rescue
	10% PANI treatment			8% PANI treatment			Untreated			Background
15min	1880	3120	2510	1920	4890	2540	2270	2270	3310	30	30	30
30min	4930	3070	2790	2830	4520	3170	2760	2760	2440	30	30	30
120min	2990	3320	564	2690	4440	750	2170	2170	1370	30	30	30
B	Bioluminescence (RLU s-1) 21 days post-rescue
	3.5% P3ABA treatment			2% P3ABA treatment			1% P3ABA treatment			Untreated			Background
15min	18	18	24	22	26	22	3110	1260	90	2270	3310	1340	30	30	30
30min	14	20	20	18	20	18	358	1230	36	2760	2440	1560	30	30	30
120min	22	20	20	26	24	22	30	1310	26	2170	1370	1350	30	30	30
FIG 3. Antimicrobial action of surface incorporated PANI and P3ABA against M. tuberculosis BSG002
A	Bioluminescence (RLU s-1) 21 days post-rescue
	10% PANI treatment			8% PANI treatment			Untreated			Background
15min	8810	6480	7100	9730	5130	8750	6340	6340	4290	30	30	30
30min	8800	8150	6040	5980	6360	9240	7930	7930	4260	30	30	30
120min	3850	26	2390	5540	24	5900	6520	6520	3900	30	30	30
B	Bioluminescence (RLU s-1) 21 days post-rescue
	3.5% P3ABA treatment			2% P3ABA treatment			1% P3ABA treatment			Untreated			Background
15min	20	18	20	22	22	18	22	1280	1480	6340	4290	6670	30	30	30
30min	16	18	20	24	22	24	24	26	1660	7930	4260	6400	30	30	30
120min	20	24	24	20	26	22	24	22	32	6520	3900	2470	30	30	30
